# Supplementary material
Source: MDPI journal article supplement (https://www.mdpi.com/2073-4344/11/10/1162)
Supplement: s1 [file s1]

## Supplementary Material

**Table S1.** Summary of the preparation perspectives of hierarchical zeolite catalysts.

| Catalyst                           | Method                                                    | Chemical                                                                                                                                                                                                                                                                                   | Condition                                                                                    |
|------------------------------------|-----------------------------------------------------------|--------------------------------------------------------------------------------------------------------------------------------------------------------------------------------------------------------------------------------------------------------------------------------------------|----------------------------------------------------------------------------------------------|
| ZSM-5 nanosheets [1]               | simple hydrothermal process                               | tetrabutylphosphonium hydroxide (TBPOH), tetraethyl orthosilicate (TEOS), aluminium isopropoxide, and sodium hydroxide (NaOH)                                                                                                                                                              | aging at ambient temperature for 12 hours, hydrothermal treatment at 130 °C for 2 days       |
| nanospherical ZSM-5 nanosheets [2] | one-pot hydrothermal process                              | aluminosilicate (AS) nanobeads, tetrabutylammonium hydroxide (TBAOH), NaOH                                                                                                                                                                                                                 | stirring at room temperature for 12 hours, crystallization at 150 °C for 2 days              |
| mesoporous ZSM-5 [3]               | hydrothermal process                                      | dimethyl octadecyl [3-(trimethoxysilyl)propyl] ammonium chloride (TPOAC) or hexadecyl trimethyl ammonium bromide (CTAB), tetrapropyl ammonium bromide (TPABr), colloidal silica (Ludox), sodium aluminate (NaAlO <sub>2</sub> ), NaOH, and sulfuric acid (H <sub>2</sub> SO <sub>4</sub> ) | stirring for 4 hours, crystallization at 180 °C for 2 days                                   |
| uniform mesoporous ZSM-5 [4]       | hydrothermal process                                      | tetrapropyl ammonium hydroxide (TPAOH), fumed silica, NaAlO <sub>2</sub> , CTAB,                                                                                                                                                                                                           | hydrothermal treatment at 150 °C for 2 days                                                  |
| hierarchical ZSM-5 [5]             | hydrothermal process                                      | sodium chloride (NaCl), aluminium isopropoxide, TPAOH, TEOS, and carbon black template                                                                                                                                                                                                     | solvent evaporation at 90 °C, hydrothermal treatment at 180 °C for 3 days                    |
| ultrathin ZSM-5 [5]                | hydrothermal process                                      | quaternary ammonium surfactant of C <sub>8</sub> H <sub>17</sub> -N <sup>+</sup> (CH <sub>3</sub> ) <sub>2</sub> -C <sub>6</sub> H <sub>12</sub> -N <sup>+</sup> (CH <sub>3</sub> ) <sub>2</sub> -C <sub>8</sub> H <sub>17</sub> , LUDOX HS-40, and aluminium sulfate octadecahydrate      | crystallization at 130 °C for 6 days under stirring condition                                |
| nanosized ZSM-5 [6]                | dry gel method with steam-assisted hydrothermal condition | hexadecyltrimethoxysilane (HTS), TEOS, aluminum tritertbutoxide (ATTB), TPAOH, and ethanol as solvent                                                                                                                                                                                      | stirring for 1 hour before the solvent evaporation, crystallization at 180 °C for 5 days     |
| nanosized BEA [7]                  | normal hydrothermal process                               | tetraethylammonium hydroxide (TEAOH), aluminum isopropoxide, NaOH, and silica powder resulting from the lyophilization of colloidal silica (Ludox AS-40)                                                                                                                                   | hydrothermal treatment at 95 °C for 9 days                                                   |
| nano-sponge BEA [7]                | hydrothermal process                                      | poly-quaternary ammonium surfactant, ethanol, NaOH, NaAlO <sub>2</sub> , and TEOS                                                                                                                                                                                                          | stirring at 60 °C for 6 hours, crystallization at 140 °C for 4 days under tumbling condition |
| nanosized CHA [8]                  | hydrothermal conversion of FAU zeolite                    | <i>N,N,N</i> -trimethyl-1-adamantammonium hydroxide (TMAdaOH), dealuminated FAU powder, NaOH, and calcined CHA seed                                                                                                                                                                        | hydrothermal treatment at 125-170 °C for 3 hours to 21 days                                  |

**Table S1.** (Continued) Summary of the preparation perspectives of hierarchical zeolite catalysts.

| Catalyst                           | Method                                    | Chemical                                                                 | Condition                                                                                                                                  |
|------------------------------------|-------------------------------------------|--------------------------------------------------------------------------|--------------------------------------------------------------------------------------------------------------------------------------------|
| ZSM-5 [9]                          | desilication                              | 0.2 M NaOH solution                                                      | vigorous stirring at 65 °C for 30 min                                                                                                      |
| ZSM-5 [10]                         | dealumination                             | 0.5 M of oxalic acid aqueous solution                                    | at 120 °C for 2 hours                                                                                                                      |
| ZSM-5 [11]                         | sequential desilication and dealumination | 0.2 M NaOH, 0.5 M oxalic acid                                            | stirring at 65 °C for 30 min (desilication), heating at 120 °C for 2 hours (dealumination)                                                 |
| zeolite L [12]                     | sequential desilication and dealumination | 0.8 M of NaOH, 0.2 M of HNO <sub>3</sub>                                 | at 65 and 80 °C for 2 hours (desilication), at 65 °C for 2 hours (dealumination)                                                           |
| zeolite L [12]                     | sequential dealumination and desilication | 0.2 M or 0.3 M of HNO <sub>3</sub> , 0.1 M of NaOH                       | at 65 °C for 2 hours (dealumination), at 65 °C for 30 min (desilication)                                                                   |
| zeolite L [12]                     | sequential dealumination and desilication | 0.2 M and 0.5 M NH <sub>4</sub> Cl, 0.1 M of NaOH                        | at 80 °C for 1 hour (dealumination)                                                                                                        |
| zeolite L [12]                     | sequential dealumination and desilication | water steaming, 0.8 M NaOH                                               | steaming at 550 or 600 °C with 1.8 ml/min of continuous liquid water flow for 3 hours (dealumination), at 80 °C for 2 hours (desilication) |
| hierarchical ZSM-5 [13]            | steam treatment                           | water steaming                                                           | at 400, 450, 500, to 550 °C for 6 hours with 13.8 h <sup>-1</sup> of WHSV in the fixed-bed flow reactor                                    |
| hierarchical ZSM-5 [5]             | alkaline treatment                        | NaOH and tetrabutylammonium hydroxide (TBAOH) mixture solution           | at 80 °C for 5 hours                                                                                                                       |
| hierarchical MFI-type zeolite [14] | ultrasonic-assisted desilication          | mixed solution of NaOH and TBAOH                                         | ultrasound condition with 600 W of power and 20 kHz of frequency, treatment at low temperature for 30 min                                  |
| mesoporous BEA [15]                | desilication                              | 0.2 M NaOH, 0.003 M Al(NO <sub>3</sub> ) <sub>3</sub> , and 0.1 M TPAOH  | at 313 K for 30 min                                                                                                                        |
| mesoporous BEA [15]                | desilication                              | 0.1 M NaOH                                                               | at 313 K for 10 min                                                                                                                        |
| mesoporous BEA [15]                | desilication                              | 0.1 M NaOH, 0.003 M Al(NO <sub>3</sub> ) <sub>3</sub> , and 0.02 M TMAOH | at 338 K for 30 min                                                                                                                        |
| mesoporous BEA [15]                | desilication                              | 0.003 M Al(NO <sub>3</sub> ) <sub>3</sub> and 0.1 M TPAOH                | at 313 K for 30 min                                                                                                                        |

**Table S1.** (Continued) Summary of the preparation perspectives of hierarchical zeolite catalysts.

| Catalyst                                                                                 | Method                            | Chemical                                                                                                                                                                                                                                                              | Condition                                                                                               |
|------------------------------------------------------------------------------------------|-----------------------------------|-----------------------------------------------------------------------------------------------------------------------------------------------------------------------------------------------------------------------------------------------------------------------|---------------------------------------------------------------------------------------------------------|
| mesoporous BEA [16]                                                                      | surfactant-template treatment     | NaOH and decyltrimethylammonium bromide (DTAB-10) or dodecyltrimethylammonium bromide (DTAB-12) or tetradecyltrimethylammonium bromide (TTAB) or cetyltrimethylammonium bromide (CTAB)                                                                                | stirring at room temperature for 30 min, hydrothermal treatment at 80-140 °C for 1-24 hours             |
| mosaic mesoporous ZSM-5 [17]                                                             | fluoride etching                  | 40 wt.% of NH <sub>4</sub> F aqueous solution                                                                                                                                                                                                                         | stirring at 50 °C for 60 min under ultrasonication                                                      |
| house-of-cards-like ZSM-5 [18]                                                           | fluoride etching                  | 40 wt.% of NH <sub>4</sub> F aqueous solution                                                                                                                                                                                                                         | at 50 °C for 60 min under mechanical stirring and ultrasonication                                       |
| pore-opened MOR [19]                                                                     | fluoride etching                  | 20 wt.% of NH <sub>4</sub> F aqueous solution                                                                                                                                                                                                                         | stirring at 50 °C for 2 hours                                                                           |
| chromosilicate ZSM-5 [20]                                                                | hydrothermal                      | silicic acid, chromium(III) nitrate, sodium carbonate or potassium carbonate or cesium carbonate, sulfuric acid, and TPABr                                                                                                                                            | vigorous stirring at room temperature for about 4 hours, hydrothermal treatment at 155 °C for 100 hours |
| alkali metal modified ZSM-5 [21]                                                         | alkali metal cations modification | LiNO <sub>3</sub> , NaNO <sub>3</sub> , KNO <sub>3</sub> and CsNO <sub>3</sub>                                                                                                                                                                                        | ion-exchange at 25 °C for 30 min under 200 rpm                                                          |
| Cs-ZSM-5 [22]                                                                            | wet impregnation                  | 0.01 M solution of cesium nitrate                                                                                                                                                                                                                                     | vigorous stirring at 80 °C for 2 hours                                                                  |
| ceria incorporated hierarchical MFI zeolite [23]                                         | ion-exchange                      | cerium(III) acetate aqueous solution                                                                                                                                                                                                                                  | at 80 °C for 2 hours                                                                                    |
| ceria supported hierarchical MFI zeolite [23]                                            | impregnation                      | cerium(III) acetate aqueous solution                                                                                                                                                                                                                                  | at room temperature for 24 hours                                                                        |
| WO <sub>x</sub> nanoparticles supported on MFI zeolite nanosheets [24]                   | incipient wetness impregnation    | ammonium metatungstate hydrate solution                                                                                                                                                                                                                               | zeolite dispersing into the solution for 2 hours                                                        |
| vanadium (V) or lanthanum (La) or titanium (Ti) incorporated ZSM-5 and FER zeolites [25] | incipient wetness impregnation    | ammonium vanadate (NH <sub>4</sub> VO <sub>3</sub> ) and hydrogen peroxide (H <sub>2</sub> O <sub>2</sub> ), aqueous solution of lanthanum nitrate hexahydrate (La(NO <sub>3</sub> ) <sub>3</sub> ·6H <sub>2</sub> O), titanium isopropoxide dissolved in isopropanol | -                                                                                                       |

**Table S1.** (Continued) Summary of the preparation perspectives of hierarchical zeolite catalysts.

| Catalyst                                                    | Method                              | Chemical                                                                                                                                                                                                           | Condition                                                                                                                                                   |
|-------------------------------------------------------------|-------------------------------------|--------------------------------------------------------------------------------------------------------------------------------------------------------------------------------------------------------------------|-------------------------------------------------------------------------------------------------------------------------------------------------------------|
| 5wt.%Ni-ZSM-5 [26]                                          | wet incipient                       | aqueous solution of $\text{Ni}(\text{NO}_3)_2 \cdot 6\text{H}_2\text{O}$                                                                                                                                           | mixing the ZSM-5 zeolite and the Ni solution for a while                                                                                                    |
| 1wt.%Ni-ZSM-5 [27]                                          | incipient wetness                   | aqueous solution of $\text{Ni}(\text{NO}_3)_2 \cdot 6\text{H}_2\text{O}$                                                                                                                                           | slow dropping the Ni solution on the ZSM-5 powder                                                                                                           |
| Ni loaded on BEA zeolite [28]                               | sol gel impregnation                | $\text{Ni}(\text{NO}_3)_2 \cdot 6\text{H}_2\text{O}$ and citric acid in deionized water                                                                                                                            | treatment at 60 °C for 12 hours                                                                                                                             |
| cobalt (Co) supported on mesoporous Y zeolite [29]          | incipient wetness impregnation      | aqueous solution of cobalt(II) nitrate                                                                                                                                                                             | -                                                                                                                                                           |
| bimetallic InV-ZSM-5 [30]                                   | ion-exchange under reflux condition | 0.05 M of vanadium(III) chloride aqueous solution, 0.015 M of indium(III) nitrate aqueous solution                                                                                                                 | 1. V loading: at 80 °C for 16 hours<br>2. In loading: at 80 °C for 16 hours                                                                                 |
| MoZn/AlPO <sub>4</sub> -5 [31]                              | incipient wetness impregnation      | aqueous solution of ammonium molybdate and zinc acetate                                                                                                                                                            | -                                                                                                                                                           |
| Ag-promoted Zr-BEA [32]                                     | stepwise metal incorporation        | $\text{ZrOCl}_2 \cdot 8\text{H}_2\text{O}$ solution in DMSO solvent, $\text{AgNO}_3$ solution                                                                                                                      | 1. Zr loading: heated at 403 K for 12 hours<br>2. Ag doping: incipient wetness impregnation                                                                 |
| Mg-ZrO <sub>x</sub> /MFI nanosheet [33]                     | incipient wetness impregnation      | zirconium oxynitrate aqueous solution, magnesium nitrate solution                                                                                                                                                  | 1. Zr impregnation<br>2. Mg impregnation                                                                                                                    |
| Ag- or Cu- or Zn-Ta/Si-rich-BEA [34]                        | stepwise metal incorporation        | solution of $\text{Ta}(\text{OC}_2\text{H}_5)_5$ in isopropanol, $\text{AgNO}_3$ or $\text{Cu}(\text{NO}_3)_2 \cdot 3\text{H}_2\text{O}$ or $\text{Zn}(\text{NO}_3)_2 \cdot 6\text{H}_2\text{O}$ aqueous solutions | 1. Ta loading: stirring at 353 K for 3 hours<br>2. Ag or Cu or Zn loading: stirring at 298 K for 2 hours                                                    |
| LiZnHf-MFI nanosheet [35]                                   | wet impregnation                    | solutions of $\text{Li}_2\text{CO}_3$ , $\text{Zn}(\text{NO}_3)_2 \cdot 6\text{H}_2\text{O}$ , and $\text{HfCl}_4$                                                                                                 | -                                                                                                                                                           |
| Cs-Fe-Mo/ZSM-5 [36]                                         | three-step impregnation             | aqueous solutions of $(\text{NH}_4)_6\text{Mo}_7\text{O}_{24} \cdot 4\text{H}_2\text{O}$ , $\text{Fe}(\text{NO}_3)_3 \cdot 9\text{H}_2\text{O}$ , and $\text{CsNO}_3$                                              | 1. Mo loading: vigorous stirring (500 rpm) at 80 °C for 2 hours<br>2. Fe adding: stirring for another 2 hours<br>3. Cs adding: stirring for another 2 hours |
| trimetallic Zn-promoted Cu-Ni alloy supported on ZSM-5 [37] | one-step impregnation               | mixed solution of $\text{Cu}(\text{NO}_3)_2 \cdot 2.5\text{H}_2\text{O}$ , $\text{Zn}(\text{NO}_3)_2 \cdot 6\text{H}_2\text{O}$ , and $\text{Ni}(\text{NO}_3)_2 \cdot 6\text{H}_2\text{O}$                         | preparation of mixed metal solution by stirring at 35 °C for 4 hours and subsequent adding of ZSM-5 powder under stirring                                   |

**Table S1.** (Continued) Summary of the preparation perspectives of hierarchical zeolite catalysts.

| Catalyst                            | Method                         | Chemical                                                                                                                                     | Condition                                                          |
|-------------------------------------|--------------------------------|----------------------------------------------------------------------------------------------------------------------------------------------|--------------------------------------------------------------------|
| bimetallic V-Cu/ZSM-5 [38]          | incipient wetness impregnation | ammonium metavanadate ( $\text{NH}_4\text{VO}_3$ ) and copper nitrate hydrate ( $\text{Cu}(\text{NO}_3)_2 \cdot x\text{H}_2\text{O}$ )       | -                                                                  |
| Cu-SSZ-13 [39]                      | one-pot synthesis              | Cu-tetraethylenepentamine (Cu-TEPA) complex from $\text{CuSO}_4 \cdot 5\text{H}_2\text{O}$ and TEPA, $\text{NaAlO}_2$ , silica sol, and NaOH | aging for 3 hours, hydrothermal heating at 140 °C for 4 days       |
| Sn- or Ge- or Zr-MFI nanosheet [40] | isomorphous substitution       | TEOS, germanium oxide or zirconyl(IV) nitrate or tin(IV) chloride pentahydrate, TBAOH, and NaOH                                              | stirring for 12 hours, hydrothermal treatment at 130 °C for 2 days |

**Table S2.** Characterization of hierarchical zeolite catalysts.

| Catalyst                                                                  | Properties                      | Characterization technique                                                    | Results                                                                                                                                                                                                                                                                                                                                                                                                                                                                                                                                                                                                                                                        |
|---------------------------------------------------------------------------|---------------------------------|-------------------------------------------------------------------------------|----------------------------------------------------------------------------------------------------------------------------------------------------------------------------------------------------------------------------------------------------------------------------------------------------------------------------------------------------------------------------------------------------------------------------------------------------------------------------------------------------------------------------------------------------------------------------------------------------------------------------------------------------------------|
| ZSM-5 zeolites before and after desilication [9]                          | textural properties             | $\text{N}_2$ -adsorption-desorption                                           | parent ZSM-5: type I isotherm, $S_{\text{external}} = 61 \text{ m}^2/\text{g}$ , $V_{\text{mesopore}} = 0.07 \text{ cm}^3/\text{g}$<br>desilicated ZSM-5: type IV isotherm, $S_{\text{external}} = 212 \text{ m}^2/\text{g}$ , $V_{\text{mesopore}} = 0.37 \text{ cm}^3/\text{g}$                                                                                                                                                                                                                                                                                                                                                                              |
| hierarchical nanosheet and microporous MFI zeolites [35]                  | morphology and porous structure | scanning electron microscope (SEM) and transmission electron microscopy (TEM) | microporous MFI: bulk hexagonal crystal morphology with 500 nm of particle size<br>hierarchical MFI nanosheet: 200 nm of uniform spherically-shaped crystals with rough surface of stacked nanosheets, 2-10 nm of sheet thickness, and intracrystalline mesopores between nanosheets                                                                                                                                                                                                                                                                                                                                                                           |
| bulk and nanosheet MFI zeolites [35]                                      | textural properties             | $\text{N}_2$ -adsorption-desorption                                           | nanosheet MFI zeolite: $S_{\text{external}} = 232 \text{ m}^2/\text{g}$ , $V_{\text{mesopore}} = 0.35 \text{ cm}^3/\text{g}$<br>bulk MFI zeolite: $S_{\text{external}} = 69 \text{ m}^2/\text{g}$ , $V_{\text{mesopore}} = 0.22 \text{ cm}^3/\text{g}$                                                                                                                                                                                                                                                                                                                                                                                                         |
| desilicated, $\text{NH}_4\text{F}$ treated, nanosheet ZSM-5 zeolites [18] | textural properties             | $\text{N}_2$ -adsorption-desorption                                           | desilicated ZSM-5: $S_{\text{BET}} = 494 \text{ m}^2/\text{g}$ , $S_{\text{ext}} = 206 \text{ m}^2/\text{g}$ , $V_{\text{mic}} = 0.13 \text{ cm}^3/\text{g}$ , $V_{\text{meso}} = 0.36 \text{ cm}^3/\text{g}$<br>$\text{NH}_4\text{F}$ treated ZSM-5: $S_{\text{BET}} = 395 \text{ m}^2/\text{g}$ , $S_{\text{ext}} = 54 \text{ m}^2/\text{g}$ , $V_{\text{mic}} = 0.17 \text{ cm}^3/\text{g}$ , $V_{\text{meso}} = 0.31 \text{ cm}^3/\text{g}$<br>nanosheet ZSM-5: $S_{\text{BET}} = 504 \text{ m}^2/\text{g}$ , $S_{\text{ext}} = 266 \text{ m}^2/\text{g}$ , $V_{\text{mic}} = 0.11 \text{ cm}^3/\text{g}$ , $V_{\text{meso}} = 0.40 \text{ cm}^3/\text{g}$ |

**Table S2.** (Continued) Characterization of hierarchical zeolite catalysts.

| Catalyst                                                                                                                     | Properties                      | Characterization technique                                                                                           | Results                                                                                                                                                                                                                                                                                                                                                                                                                                                                                                                                                                                                                                                                                                                                                                                                                                                                                                                                                                                                                                                                                                                                                                                                                                            |
|------------------------------------------------------------------------------------------------------------------------------|---------------------------------|----------------------------------------------------------------------------------------------------------------------|----------------------------------------------------------------------------------------------------------------------------------------------------------------------------------------------------------------------------------------------------------------------------------------------------------------------------------------------------------------------------------------------------------------------------------------------------------------------------------------------------------------------------------------------------------------------------------------------------------------------------------------------------------------------------------------------------------------------------------------------------------------------------------------------------------------------------------------------------------------------------------------------------------------------------------------------------------------------------------------------------------------------------------------------------------------------------------------------------------------------------------------------------------------------------------------------------------------------------------------------------|
| hierarchical BEA zeolites prepared by treatment with various surfactants [16]                                                | textural properties             | N <sub>2</sub> -physisorption                                                                                        | DTAB-10: $S_{\text{BET}} = 495 \text{ m}^2/\text{g}$ , $S_{\text{micro}} = 332 \text{ m}^2/\text{g}$ , $S_{\text{meso}} = 163 \text{ m}^2/\text{g}$ , $V_{\text{total}} = 0.386 \text{ cm}^3/\text{g}$ , $V_{\text{micro}} = 0.175 \text{ cm}^3/\text{g}$ , $V_{\text{meso}} = 0.211 \text{ cm}^3/\text{g}$<br>DTAB-12: $S_{\text{BET}} = 541 \text{ m}^2/\text{g}$ , $S_{\text{micro}} = 327 \text{ m}^2/\text{g}$ , $S_{\text{meso}} = 214 \text{ m}^2/\text{g}$ , $V_{\text{total}} = 0.412 \text{ cm}^3/\text{g}$ , $V_{\text{micro}} = 0.169 \text{ cm}^3/\text{g}$ , $V_{\text{meso}} = 0.243 \text{ cm}^3/\text{g}$<br>TTAB: $S_{\text{BET}} = 540 \text{ m}^2/\text{g}$ , $S_{\text{micro}} = 332 \text{ m}^2/\text{g}$ , $S_{\text{meso}} = 208 \text{ m}^2/\text{g}$ , $V_{\text{total}} = 0.403 \text{ cm}^3/\text{g}$ , $V_{\text{micro}} = 0.172 \text{ cm}^3/\text{g}$ , $V_{\text{meso}} = 0.231 \text{ cm}^3/\text{g}$<br>CTAB: $S_{\text{BET}} = 519 \text{ m}^2/\text{g}$ , $S_{\text{micro}} = 315 \text{ m}^2/\text{g}$ , $S_{\text{meso}} = 208 \text{ m}^2/\text{g}$ , $V_{\text{total}} = 0.422 \text{ cm}^3/\text{g}$ , $V_{\text{micro}} = 0.164 \text{ cm}^3/\text{g}$ , $V_{\text{meso}} = 0.258 \text{ cm}^3/\text{g}$ |
| micron-sized (MC), nanometer-sized (NC), and nano-sponge (NS) BEA zeolites [7]                                               | morphology and porous structure | SEM and TEM                                                                                                          | MC BEA: bulk bipyramidal morphology<br>NC BEA: random aggregation of nanocrystals with intercrystalline mesopores<br>NS BEA: sponge-like morphology with ordered mesopores                                                                                                                                                                                                                                                                                                                                                                                                                                                                                                                                                                                                                                                                                                                                                                                                                                                                                                                                                                                                                                                                         |
| micron-sized (MC), nanometer-sized (NC), and nano-sponge (NS) BEA zeolites [7]                                               | textural properties             | N <sub>2</sub> -physisorption                                                                                        | MC BEA: $S_{\text{BET}} = 626 \text{ m}^2/\text{g}$ , $S_{\text{ext}} = 33 \text{ m}^2/\text{g}$ , $V_{\text{micro}} = 0.23 \text{ cm}^3/\text{g}$ , $V_{\text{meso}} = 0.05 \text{ m}^3/\text{g}$<br>NC BEA: $S_{\text{BET}} = 726 \text{ m}^2/\text{g}$ , $S_{\text{ext}} = 223 \text{ m}^2/\text{g}$ , $V_{\text{micro}} = 0.24 \text{ cm}^3/\text{g}$ , $V_{\text{meso}} = 0.71 \text{ m}^3/\text{g}$<br>NS BEA: $S_{\text{BET}} = 977 \text{ m}^2/\text{g}$ , $S_{\text{ext}} = 185 \text{ m}^2/\text{g}$ , $V_{\text{micro}} = 0.30 \text{ cm}^3/\text{g}$ , $V_{\text{meso}} = 0.74 \text{ m}^3/\text{g}$                                                                                                                                                                                                                                                                                                                                                                                                                                                                                                                                                                                                                                   |
| pure silica MFI zeolite nanosheets before and after the incorporation of tungsten oxide (WO <sub>x</sub> ) nanoparticle [24] | textural properties             | N <sub>2</sub> -physisorption                                                                                        | pristine MFI: $S_{\text{BET}} = 642 \text{ m}^2/\text{g}$ , $S_{\text{micro}} = 152 \text{ m}^2/\text{g}$ , $S_{\text{ext}} = 489 \text{ m}^2/\text{g}$ , $V_{\text{total}} = 0.71 \text{ cm}^3/\text{g}$<br>2mol%WO <sub>x</sub> -MFI: $S_{\text{BET}} = 470 \text{ m}^2/\text{g}$ , $S_{\text{micro}} = 153 \text{ m}^2/\text{g}$ , $S_{\text{ext}} = 317 \text{ m}^2/\text{g}$ , $V_{\text{total}} = 0.577 \text{ cm}^3/\text{g}$<br>6mol%WO <sub>x</sub> -MFI: $S_{\text{BET}} = 396 \text{ m}^2/\text{g}$ , $S_{\text{micro}} = 128 \text{ m}^2/\text{g}$ , $S_{\text{ext}} = 267 \text{ m}^2/\text{g}$ , $V_{\text{total}} = 0.49 \text{ cm}^3/\text{g}$                                                                                                                                                                                                                                                                                                                                                                                                                                                                                                                                                                                     |
| microporous, desilicated, mesoporous, carbon-black templated, and ultrathin ZSM-5 zeolites [5]                               | porosities                      | quasi-equilibrated temperature programmed desorption and adsorption (QE-TPDA) of <i>n</i> -nonane (nC <sub>9</sub> ) | microporous ZSM-5: $V_{\text{micro}} = 0.17 \text{ cm}^3/\text{g}$ , $V_{\text{meso}} = 0.09 \text{ cm}^3/\text{g}$<br>desilicated ZSM-5: $V_{\text{micro}} = 0.15 \text{ cm}^3/\text{g}$ , $V_{\text{meso}} = 0.37 \text{ cm}^3/\text{g}$<br>mesoporous ZSM-5: $V_{\text{micro}} = 0.14 \text{ cm}^3/\text{g}$ , $V_{\text{meso}} = 0.43 \text{ cm}^3/\text{g}$<br>carbon-templated ZSM-5: $V_{\text{micro}} = 0.16 \text{ cm}^3/\text{g}$ , $V_{\text{meso}} = 0.09 \text{ cm}^3/\text{g}$<br>ultrathin ZSM-5: $V_{\text{micro}} = 0.12 \text{ cm}^3/\text{g}$ , $V_{\text{meso}} = 0.20 \text{ cm}^3/\text{g}$                                                                                                                                                                                                                                                                                                                                                                                                                                                                                                                                                                                                                                  |

**Table S2.** (Continued) Characterization of hierarchical zeolite catalysts.

| Catalyst                                                                                       | Properties                                                             | Characterization technique                                                           | Results                                                                                                                                                                                                                                                                                                                                                                                                                                                                                                                                                                                                        |
|------------------------------------------------------------------------------------------------|------------------------------------------------------------------------|--------------------------------------------------------------------------------------|----------------------------------------------------------------------------------------------------------------------------------------------------------------------------------------------------------------------------------------------------------------------------------------------------------------------------------------------------------------------------------------------------------------------------------------------------------------------------------------------------------------------------------------------------------------------------------------------------------------|
| MOR zeolites before and after $\text{NH}_4\text{F}$ etching [19]                               | pore architecture in 3-dimensional view                                | electron tomography (ET) with the tilting angles from $-70^\circ$ to $+70^\circ$     | parent MOR: small amount of closed mesopores inside the zeolite crystal<br>$\text{NH}_4\text{F}$ treated MOR: opened-porous structure with the pore network connectivity from the external surface into the internal zeolite crystal                                                                                                                                                                                                                                                                                                                                                                           |
| zeolite Y catalysts before and after the acid modification with phosphoric acid [41]           | acidic properties                                                      | temperature programmed desorption of ammonia ( $\text{NH}_3$ -TPD)                   | total number of acid sites: 12.3 mmol/g of parent Y zeolite, 3.4, 4.7, and 6.0 mmol/g of 10, 20, and 30 wt.% $\text{H}_3\text{PO}_4$ modified Y zeolites                                                                                                                                                                                                                                                                                                                                                                                                                                                       |
| ZSM-5 zeolites before and after steam treatment [13]                                           | acidic properties                                                      | $\text{NH}_3$ -TPD                                                                   | The steam treated ZSM-5 displayed lower acid strength compared to the parent one.                                                                                                                                                                                                                                                                                                                                                                                                                                                                                                                              |
| isolated ZSM-5 zeolite and hierarchical ZSM-5@Silicalite-1 nanosheet composite [42]            | acidic properties                                                      | $\text{NH}_3$ -TPD                                                                   | isolated ZSM-5 zeolite: 0.966 mmol/g of total acidity<br>hierarchical ZSM-5@Silicalite-1 nanosheet composite: 0.184 mmol/g of total acidity                                                                                                                                                                                                                                                                                                                                                                                                                                                                    |
| Li, Zn, and Hf incorporated microporous (M) and nanosheet (NS) MFI zeolites [35]               | qualitative and quantitative analysis of Brønsted and Lewis acid sites | Fourier transform infrared spectroscopy (FTIR) of pyridine adsorption                | number of Lewis acid sites (LAS):<br>ZnHf-MFI(M) = 18 $\mu\text{mol/g}$ , ZnHf-MFI(NS) = 36 $\mu\text{mol/g}$ ,<br>LiZnHf-MFI(NS) = 32 $\mu\text{mol/g}$ , LiZnHf-MFI(M) = 14 $\mu\text{mol/g}$                                                                                                                                                                                                                                                                                                                                                                                                                |
| microporous, desilicated, mesoporous, carbon-black templated, and ultrathin ZSM-5 zeolites [5] | accessibility of acid sites                                            | FTIR of 2,6-di- <i>tert</i> -butylpyridine (dTBPY) and pivalonitrile (Pn) adsorption | accessibility factors for 2,6-di- <i>tert</i> -butylpyridine ( $\text{AF}_{\text{dTBPY}}$ ) and pivalonitrile ( $\text{AF}_{\text{Pn}}$ )<br>microporous ZSM-5: $\text{AF}_{\text{dTBPY}} = 0.04$ , $\text{AF}_{\text{Pn}} = 0.12$<br>desilicated ZSM-5: $\text{AF}_{\text{dTBPY}} = 0.24$ , $\text{AF}_{\text{Pn}} = 0.41$<br>mesoporous ZSM-5: $\text{AF}_{\text{dTBPY}} = 0.49$ , $\text{AF}_{\text{Pn}} = 0.51$<br>carbon-black templated ZSM-5: $\text{AF}_{\text{dTBPY}} = 0.04$ , $\text{AF}_{\text{Pn}} = 0.10$<br>ultrathin ZSM-5: $\text{AF}_{\text{dTBPY}} = 0.45$ , $\text{AF}_{\text{Pn}} = 0.73$ |
| Zr incorporated dealuminated BEA catalysts [43]                                                | acidities                                                              | FTIR of CO adsorption                                                                | area of band centered at $2228\text{ cm}^{-1}$ ( $\text{Al}^{3+}$ Lewis acid sites), $2174\text{ cm}^{-1}$ (Brønsted acid sites), and $2188\text{ cm}^{-1}$ ( $\text{Zr}^{4+}$ Lewis sites)<br>1.3 wt.% Zr-BEA: < 0.002, 0.06, and 0.99<br>2.1 wt.% Zr-BEA: < 0.002, 0.07, and 1.50<br>3.3 wt.% Zr-BEA: < 0.002, 0.07, and 2.36<br>3.5 wt.% Zr-BEA: < 0.002, 0.11, and 2.49                                                                                                                                                                                                                                    |

**Table S2.** (Continued) Characterization of hierarchical zeolite catalysts.

| Catalyst                                                    | Properties       | Characterization technique                       | Results                                                                                                                                                                                                                                                                                                                                                                                                                                                                                                                                    |
|-------------------------------------------------------------|------------------|--------------------------------------------------|--------------------------------------------------------------------------------------------------------------------------------------------------------------------------------------------------------------------------------------------------------------------------------------------------------------------------------------------------------------------------------------------------------------------------------------------------------------------------------------------------------------------------------------------|
| Ta-BEA and MTa-BEA catalysts where M is Ag, Cu, or Zn [34]  | basic properties | FTIR of pyrrole and CDCl <sub>3</sub> adsorption | <p>Pyrrole: The shoulder band at 3390 cm<sup>-1</sup> was found in all BEA catalysts indicating the presence of weak basic sites.</p> <p>CDCl<sub>3</sub>: The Ta-BEA sample showed the bands at 2258 and 2224 cm<sup>-1</sup> which are assigned to weak and medium basic sites, respectively. The MTa-BEA catalysts presented only the band of weak basic sites at 2256 cm<sup>-1</sup>.</p>                                                                                                                                             |
| MTa-BEA catalysts where M is Ag, Cu, or Zn [34]             | metal species    | X-ray photoelectron spectroscopy (XPS)           | <p>Ta 4f<sub>5/2</sub> and 4f<sub>7/2</sub> (29.1-29.2 and 24.8-25.2 eV): Ta(V) species with well dispersion on the zeolite surfaces</p> <p>Ag 3d<sub>3/2</sub> and 3d<sub>5/2</sub> (374.6 and 368.65 eV): Ag(I) species and oxidized silver clusters</p> <p>Cu 2p<sub>1/2</sub> and 2p<sub>3/2</sub> (953.3 and 933.3 eV): Cu(II) species with well dispersion and strong interaction with the BEA zeolite</p> <p>Zn 2p<sub>1/2</sub> and 2p<sub>3/2</sub> (1045.5 and 1022.5 eV): Zn(II) species dispersed in the zeolite structure</p> |
| Zr supported on microporous and nanosheet MFI zeolites [33] | metal species    | UV-vis diffuse reflectance spectroscopy          | <p>microporous MFI: the shoulder band at 230 nm of Zr-O-Zr linkages in nanoscopic regions</p> <p>MFI nanosheet: the highest absorbance edge energy of Zr indicating the best dispersion of Zr oxide</p> <p>both MFI supports: the blue shift from 230-240 nm of bulk ZrO<sub>2</sub> to 205-215 nm indicating the ligand-to-metal charge transfer (LMCT) from O<sup>2-</sup> to isolated Zr<sup>4+</sup> in the tetrahedral structure</p>                                                                                                  |
| Zr supported on microporous and nanosheet MFI zeolites [33] | metal species    | Raman spectroscopy                               | <p>the band at 637 cm<sup>-1</sup>: the monoclinic ZrO<sub>2</sub></p> <p>the bands at 550 and 476 cm<sup>-1</sup>: the three-dimensional amorphous ZrO<sub>2</sub></p> <p>MFI nanosheet: These bands showed very low intensity demonstrating the high dispersion of ZrO<sub>2</sub> without the formation of bulk ZrO<sub>2</sub> species.</p>                                                                                                                                                                                            |



**Table S2.** (Continued) Characterization of hierarchical zeolite catalysts.

| Catalyst                                                                    | Properties    | Characterization technique                                     | Results                                                                                                                                                                                                                                                                                           |
|-----------------------------------------------------------------------------|---------------|----------------------------------------------------------------|---------------------------------------------------------------------------------------------------------------------------------------------------------------------------------------------------------------------------------------------------------------------------------------------------|
| Ce incorporated conventional and hierarchical ZSM-5 zeolites [23]           | metal species | X-ray absorption near edge structure (XANES)                   | conventional ZSM-5: high fraction of Ce <sup>4+</sup> species<br>hierarchical ZSM-5: high fraction of Ce <sup>3+</sup> species with highly dispersed and very small Ce particles<br>XANES: an absorption band at 10,213 eV of the W <sup>6+</sup> species in monoclinic WO <sub>3</sub>           |
| tungsten oxide (WO <sub>x</sub> ) supported on MFI nanosheet catalysts [24] | metal species | XANES and the Extended X-ray absorption fine structure (EXAFS) | EXAFS: - 1.8 Å of bond distance between a tungsten atom and a nearest oxygen atom in the monoclinic WO <sub>3</sub><br>- The coordination number (CN) increased with the increasing of tungsten oxide content confirming the larger particle size of tungsten oxide in the higher loading sample. |

**Table S3.** Catalytic behaviors of hierarchical zeolites in bioethanol conversion to monomers.

| Reaction               | Catalyst                                                                       | Condition                                                                                | Catalytic performance                                                                                                                                                                                                                           |
|------------------------|--------------------------------------------------------------------------------|------------------------------------------------------------------------------------------|-------------------------------------------------------------------------------------------------------------------------------------------------------------------------------------------------------------------------------------------------|
| Bioethanol dehydration | alkaline-acid treated zeolite L [12]                                           | 280 °C, atmospheric pressure, 1.7 h <sup>-1</sup> of space velocity                      | 99% of ethanol conversion and 96% of ethylene yield                                                                                                                                                                                             |
|                        | desilicated and dealuminated ZSM-5 zeolites [11]                               | 200 °C, ambient pressure, 0.2 g of catalyst, 19.8 kPa of ethanol partial pressure in He  | 70-76% of ethanol conversion and ~5-17% of ethylene selectivity                                                                                                                                                                                 |
|                        | dealuminated ZSM-5 [10]                                                        | 220 °C, 2.5 h <sup>-1</sup> of WHSV, 95% of ethanol concentration                        | 98.5% of ethylene yield and 100% of ethylene selectivity                                                                                                                                                                                        |
|                        | phosphorous modified ZSM-5 [10]                                                | 240 °C, 1.5 h <sup>-1</sup> of WHSV, 20% of the ethanol concentration                    | 94.3% of ethylene yield and 94.4% of ethylene selectivity                                                                                                                                                                                       |
|                        | 10-30 wt.% of H <sub>3</sub> PO <sub>4</sub> modified zeolite Y catalysts [41] | 673 K, 4.6 × 10 <sup>4</sup> h <sup>-1</sup> of WHSV, 16 kPa of ethanol partial pressure | 10wt.%H <sub>3</sub> PO <sub>4</sub> /Y zeolite: 98.3 of ethylene selectivity<br>20wt.%H <sub>3</sub> PO <sub>4</sub> /Y zeolite: 93.9 of ethylene selectivity<br>30wt.%H <sub>3</sub> PO <sub>4</sub> /Y zeolite: 96.5 of ethylene selectivity |
|                        | 20 wt.% of NH <sub>4</sub> F treated MOR zeolite [19]                          | 400 °C, 0.2 g of catalyst, 2 g/h of ethanol with 2.5 M ratio of N <sub>2</sub> /ethanol  | approximately 80% of ethylene yield                                                                                                                                                                                                             |
|                        | steam-treated ZSM-5 at 500 °C [13]                                             | 275 °C, atmospheric pressure, 1.0 g of catalyst, 2.37 h <sup>-1</sup> of WHSV            | 98.6% of ethanol conversion and 98.5% of ethylene selectivity                                                                                                                                                                                   |

**Table S3.** (Continued) Catalytic behaviors of hierarchical zeolites in bioethanol conversion to monomers.

| Reaction               | Catalyst                                                                                       | Condition                                                                                                                                                                            | Catalytic performance                                                                                                                                                                                                                                                                                                                                                                                                           |
|------------------------|------------------------------------------------------------------------------------------------|--------------------------------------------------------------------------------------------------------------------------------------------------------------------------------------|---------------------------------------------------------------------------------------------------------------------------------------------------------------------------------------------------------------------------------------------------------------------------------------------------------------------------------------------------------------------------------------------------------------------------------|
| Bioethanol dehydration | nanoscale and microscale ZSM-5 catalysts [44]                                                  | 240 °C, atmospheric pressure, 1 g of catalyst, 45(v)% of ethanol concentration, 0.8 h <sup>-1</sup> of WHSV                                                                          | nanoscale ZSM-5: 98.27% of ethanol conversion and 96.48% of ethylene selectivity at 260 h of TOS<br>microscale ZSM-5: 92.92% of ethanol conversion and 93.00% of ethylene selectivity at 50 h of TOS                                                                                                                                                                                                                            |
|                        | microporous, desilicated, mesoporous, carbon-black templated, and ultrathin ZSM-5 zeolites [5] | 240 °C, 0.05 g of catalyst, 1.1 g <sub>ethanol</sub> g <sub>catalyst</sub> <sup>-1</sup> h <sup>-1</sup> of space velocity                                                           | site time yield (STY, 10 <sup>-2</sup> g/s)<br>microporous ZSM-5: STY <sub>DEE</sub> = 1.92, STY <sub>C2</sub> = 4.04<br>desilicated ZSM-5: STY <sub>DEE</sub> = 1.78, STY <sub>C2</sub> = 4.31<br>mesoporous ZSM-5: STY <sub>DEE</sub> = 3.01, STY <sub>C2</sub> = 0.85<br>carbon templated ZSM-5: STY <sub>DEE</sub> = 0.11, STY <sub>C2</sub> = 5.26<br>ultrathin ZSM-5: STY <sub>DEE</sub> = 3.21, STY <sub>C2</sub> = 1.41 |
|                        | hierarchical SAPO-34@ZSM-5 and SAPO-34@silicalite-1 core-shell zeolite composites [45]         | 400 °C, atmospheric pressure, 0.5 g of catalyst, 1.5 mL h <sup>-1</sup> of ethanol                                                                                                   | SAPO-34@ZSM-5: 84.5% of ethanol conversion, ~65% of ethylene selectivity, ~15% of propylene selectivity, and ~80% of total light olefins selectivity<br>SAPO-34@silicalite-1: 65.8% of ethanol conversion and ~99% of ethylene selectivity                                                                                                                                                                                      |
|                        | Ti loaded on dealuminated ZSM-5 zeolite [25]                                                   | 280 °C, 1 g of catalyst, 7 h <sup>-1</sup> of WHSV                                                                                                                                   | 96% of ethanol conversion and 88% of ethylene selectivity                                                                                                                                                                                                                                                                                                                                                                       |
|                        | ceria incorporated hierarchical ZSM-5 nanosheet zeolite [23]                                   | 350 °C, 5 h <sup>-1</sup> of WHSV <sub>EtOH</sub> , 0.1 g of catalyst                                                                                                                | yield of ethylene close to 100%                                                                                                                                                                                                                                                                                                                                                                                                 |
|                        | WO <sub>x</sub> nanoparticles supported on MFI zeolite nanosheets [24]                         | 450 °C, 1.5 h <sup>-1</sup> of WHSV, 100 mg of catalyst                                                                                                                              | ethylene selectivity decreased in the following order:<br>1mol%WO <sub>x</sub> -MFI (92.86%) > 2mol%WO <sub>x</sub> -MFI (92.54%)<br>> 6mol%WO <sub>x</sub> -MFI (92.44%) > 4mol%WO <sub>x</sub> -MFI (91.07%)                                                                                                                                                                                                                  |
|                        | Cu-SSZ-13 zeolite [39]                                                                         | 212 °C, 1 atm of pressure, 1.63 h <sup>-1</sup> of WHSV                                                                                                                              | higher than 99% of ethylene yield                                                                                                                                                                                                                                                                                                                                                                                               |
|                        | MoZn/AlPO <sub>4</sub> -5 zeolite (Mo/Zn molar ratio = 4) [46]                                 | 400 °C, atmospheric pressure, 250 mg of catalyst, ethanol diluted in N <sub>2</sub> with flow rate of N <sub>2</sub> 20 ml/min and isothermal saturator filled with ethanol at 20 °C | ~87% of ethanol conversion and 93% of ethylene selectivity                                                                                                                                                                                                                                                                                                                                                                      |

**Table S3.** (Continued) Catalytic behaviors of hierarchical zeolites in bioethanol conversion to monomers.

| Reaction                   | Catalyst                                                      | Condition                                                                                                                 | Catalytic performance                                                                                                                                                                                                                                                                                                                                                                                                                                                                                                                                                |
|----------------------------|---------------------------------------------------------------|---------------------------------------------------------------------------------------------------------------------------|----------------------------------------------------------------------------------------------------------------------------------------------------------------------------------------------------------------------------------------------------------------------------------------------------------------------------------------------------------------------------------------------------------------------------------------------------------------------------------------------------------------------------------------------------------------------|
| Bioethanol to hydrocarbons | HZSM-5 zeolite (Si/Al ratio of 15) [47]                       | 300 °C, 320 °C, 360 °C, and 400 °C, ~4.7 h <sup>-1</sup> of WHSV, 300 psig                                                | - production amount of both paraffin and naphthene compounds: 300 °C > 320 °C > 360 °C > 400 °C<br>- small amount of olefin production: 300 and 400 °C - no olefin production: 320 and 360 °C<br>- production amount of benzene and xylene: 400 °C > 360 °C > 320 °C > 300 °C                                                                                                                                                                                                                                                                                        |
|                            | alkali-treated HZSM-5 zeolites with different Si/Al ratio [9] | 360 °C, 15 bar, ~38 h <sup>-1</sup> , and 3 h of TOS                                                                      | low Si/Al ratio: more ethylene selective<br>high Si/Al ratio: higher ethanol conversion and formation of heavier hydrocarbons                                                                                                                                                                                                                                                                                                                                                                                                                                        |
|                            | fluorinated ZSM-5 catalysts [48]                              | 500 °C, atmospheric pressure, ethanol/water = 9/1 vol/vol, and 10 h <sup>-1</sup> of WHSV                                 | 100% ethanol conversion for all catalysts<br>5wt.%F-ZSM-5: 12.4% of ethylene, 16.4% of propylene, 9.7% of butylene, 37.5% of paraffins + aliphatics, 24.0% of aromatics<br>10wt.%F-ZSM-5: 17.5% of ethylene, 21.2% of propylene, 9.5% of butylene, 37.6% of paraffins + aliphatics, 14.1% of aromatics<br>15wt.%F-ZSM-5: 19.1% of ethylene, 21.5% of propylene, 9.6% of butylene, 33.1% of paraffins + aliphatics, 16.7% of aromatics<br>20wt.%F-ZSM-5: 21.9% of ethylene, 21.4% of propylene, 8.6% of butylene, 33.1% of paraffins + aliphatics, 15.0% of aromatics |
|                            |                                                               |                                                                                                                           | low Si/Al ratio samples (~40): lifetime of nano-sized ZSM-5 > conventional ZSM-5 approximately 2 times<br>high Si/Al ratio zeolites (~140): lifetime of nano-sized ZSM-5 > conventional ZSM-5 approximately 5 times                                                                                                                                                                                                                                                                                                                                                  |
|                            |                                                               |                                                                                                                           | 100% of ethanol conversion for both catalysts<br>nanosized CHA: 61.9% yield of C <sub>2</sub> H <sub>4</sub> and 19.6% yield of C <sub>3</sub> H <sub>6</sub><br>conventional CHA: 85.7% yield of C <sub>2</sub> H <sub>4</sub> and 10.4% yield of C <sub>3</sub> H <sub>6</sub>                                                                                                                                                                                                                                                                                     |
|                            | nanosized and conventional CHA zeolites [8]                   | 400 °C, atmospheric pressure, total flow rate of 20 ml/min (C <sub>2</sub> H <sub>5</sub> OH/N <sub>2</sub> = 50/50 mol%) |                                                                                                                                                                                                                                                                                                                                                                                                                                                                                                                                                                      |

**Table S3.** (Continued) Catalytic behaviors of hierarchical zeolites in bioethanol conversion to monomers.

| Reaction                   | Catalyst                                                                         | Condition                                                                                                                      | Catalytic performance                                                                                                                                                                                                                                                                                                                                                                                                                                                                                               |
|----------------------------|----------------------------------------------------------------------------------|--------------------------------------------------------------------------------------------------------------------------------|---------------------------------------------------------------------------------------------------------------------------------------------------------------------------------------------------------------------------------------------------------------------------------------------------------------------------------------------------------------------------------------------------------------------------------------------------------------------------------------------------------------------|
| Bioethanol to hydrocarbons | hierarchical mesoporous ZSM-5 synthesized using the HZSM-5 zeolite as a seed [4] | 450 °C, 3 g of catalyst, atmospheric pressure,<br>2 ml/h of ethanol feed mixed with helium<br>co-fed at 13.725 ml/min          | mesoporous ZSM-5: - Ethylene was the main gas product and stable after 20 h of TOS.<br>- a decrease in C <sub>10+</sub> aromatic selectivity with an increase of TOS<br>- much higher production content of large hydrocarbons including kerosene and gas oil<br>HZSM-5: - a decrease in propane selectivity and an increase in ethylene, propylene, and mixed C <sub>4</sub> gas product selectivity<br>- production of large hydrocarbons such as C <sub>9</sub> and C <sub>10+</sub> aromatics after 96 h of TOS |
|                            | micron- and nanometer-size H-ZSM-5 zeolites [49]                                 | 623 K and 3.0 MPa of pressure                                                                                                  | catalytic stability: nanometer-size H-ZSM-5 >> micron-size H-ZSM-5                                                                                                                                                                                                                                                                                                                                                                                                                                                  |
|                            | micron-sized, nanometer-sized, and nano-sponge BEA-type zeolites [7]             | 350 °C, 30 bar of total pressure, N <sub>2</sub> /EtOH molar ratio = 4, gas hourly space velocity (GHSV) = 5.3 h <sup>-1</sup> | complete ethanol conversion: nanosized and micron-sized BEA zeolites<br>nano-sponge BEA: slightly lower ethanol conversion<br>rate of catalyst deactivation: micron-sized >>> nanometer-sized > nano-sponge<br>catalytic stability: nano-sponge > nanosized                                                                                                                                                                                                                                                         |
|                            | NH <sub>4</sub> F treated, desilicated, and nanosheet ZSM-5 zeolites [18]        | 623 K, 3.0 MPa of total pressure, N <sub>2</sub> /EtOH molar ratio = 4, gas hourly space velocity (GHSV) = 5.3 h <sup>-1</sup> | parent ZSM-5: very low catalytic activity with only 35% of the initial C <sub>3+</sub> yield and rapid catalyst deactivation<br>desilicated ZSM-5: almost 100% of C <sub>3+</sub> yield at the initial stage but fast catalyst deactivation<br>nanosheet ZSM-5: lower initial C <sub>3+</sub> yield but slower catalyst deactivation than desilicated ZSM-5<br>NH <sub>4</sub> F treated ZSM-5: the highest catalytic stability with 60 mol% of C <sub>3+</sub> yield after 90 hours of TOS                         |
|                            | Ni/HZSM-5 zeolite [50]                                                           | 673 K, WHSV = 0.5, 1.8, and 3.5 h <sup>-1</sup>                                                                                | product distribution: high capability of aromatics and gaseous hydrocarbons production at lower WHSV<br>ethanol conversion: stable at 90% during 168 hours of reaction time                                                                                                                                                                                                                                                                                                                                         |
|                            |                                                                                  |                                                                                                                                |                                                                                                                                                                                                                                                                                                                                                                                                                                                                                                                     |

**Table S3.** (Continued) Catalytic behaviors of hierarchical zeolites in bioethanol conversion to monomers.

| Reaction                   | Catalyst                                                        | Condition                                                                                                                                                                                                                                                                                                       | Catalytic performance                                                                                                                                                                                                                                                                                                                                                                                                                                                                                      |
|----------------------------|-----------------------------------------------------------------|-----------------------------------------------------------------------------------------------------------------------------------------------------------------------------------------------------------------------------------------------------------------------------------------------------------------|------------------------------------------------------------------------------------------------------------------------------------------------------------------------------------------------------------------------------------------------------------------------------------------------------------------------------------------------------------------------------------------------------------------------------------------------------------------------------------------------------------|
| Bioethanol to hydrocarbons | bimetallic InV-ZSM-5 zeolite [51]                               | 250-450 °C, 0.2 g of catalyst, 1.6 h <sup>-1</sup> of WHSV                                                                                                                                                                                                                                                      | <ul style="list-style-type: none"> <li>- higher yield of valuable C<sub>3+</sub> products compared to the V-ZSM-5 and In-ZSM-5 zeolites</li> <li>- product distribution: 19% of C<sub>3</sub>-C<sub>4</sub> olefins, 35% of C<sub>3</sub>-C<sub>4</sub> paraffins, and 33% of C<sub>5+</sub> liquid fractions</li> <li>- C<sub>5+</sub> liquid fractions: 6.5% of olefins, 3.8% of paraffins, 24.0% of iso-paraffins, 5.4% of naphthenes, 60.2% of aromatics, and 4.2% of unidentified products</li> </ul> |
| Bioethanol to butadiene    | MgO impregnated on microporous and mesoporous LTA zeolites [15] | continuous two-step gas phase setup (0.400 g of CuO\SiO <sub>2</sub> used in the first stage), 0.002 ml/min of ethanol feed                                                                                                                                                                                     | <p>microporous MgO/LTA: 23% of ethanol conversion</p> <p>mesoporous MgO/LTA: 45% of ethanol conversion, high production amount of croton aldehyde and high polar C<sub>4</sub> compound</p>                                                                                                                                                                                                                                                                                                                |
|                            | Zr incorporated microporous and mesoporous BEA zeolites [52]    | ethanol-acetaldehyde mixed feed with a molar ratio of 1:1 and 40 ml/min of nitrogen as the carrier gas, 325 °C, atmospheric pressure, 0.5 g of catalyst                                                                                                                                                         | <p>microporous Zr-BEA: 55% of conversion and 75% of butadiene selectivity at the initial reaction stage, 35% of conversion and 59% of butadiene selectivity after 6 hours of TOS</p> <p>mesoporous Zr-BEA: 58% of initial conversion, 44% of conversion after 6 hours of TOS, maintained more than 60% of butadiene selectivity at 6 hours of TOS</p>                                                                                                                                                      |
|                            | 1.2%Mg-16%Zr/MFI nanosheet [33]                                 | two-step method in a dual fixed-bed reactor system, <i>in-situ</i> generated ethanol-acetaldehyde mixture in the first fixed-bed reactor using 1 g of 20%Cu/SiO <sub>2</sub> as a catalyst and ethanol as a reactant, 1 g of catalyst, T = 350 °C, 1.44 h <sup>-1</sup> of WHSV, ethanol : acetaldehyde = 2 : 1 | <p>conversion: 41.5% of total, 30.1% of ethanol, 64.4% of acetaldehyde</p> <p>product selectivity: 7% of ethylene, 74.6% of 1,3-butadiene, 8.4% of diethyl ether, 5.4% of crotonaldehyde</p>                                                                                                                                                                                                                                                                                                               |

**Table S3.** (Continued) Catalytic behaviors of hierarchical zeolites in bioethanol conversion to monomers.

| Reaction                | Catalyst                                                           | Condition                                                                                                 | Catalytic performance                                                                                                                                                                                                                                                                                                                                                   |
|-------------------------|--------------------------------------------------------------------|-----------------------------------------------------------------------------------------------------------|-------------------------------------------------------------------------------------------------------------------------------------------------------------------------------------------------------------------------------------------------------------------------------------------------------------------------------------------------------------------------|
| Bioethanol to butadiene | Ag-promoted Zr/BEA zeolite [43]                                    | 593 K, atmospheric pressure, 2 g of catalyst, molar ratio of EtOH/He = 1, 1.2-3.0 h <sup>-1</sup> of WHSV | initial formation rate (μmol g <sup>-1</sup> s <sup>-1</sup> )<br>parent BEA: 2.5 of ethylene + diethyl ether<br>dealuminated BEA: 1.25 of ethylene + diethyl ether<br>Ag doped dealuminated BEA: 1.20 of ethylene + diethyl ether, 1.89 of acetaldehyde, 0.12 of butadiene<br>Ag-3.5%Zr/BEA: 1.11 of ethylene + diethyl ether, 0.15 of acetaldehyde, 2.99 of butadiene |
|                         | bimetallic AgTa/BEA, CuTa/BEA, and ZnTa/BEA zeolite catalysts [34] | 598 K, atmospheric pressure, 0.25 g of catalyst, 0.5 h <sup>-1</sup> of WHSV, time-on-stream = 3.5 h      | Ta/BEA: 13.3% of ethanol conversion and 16.4% of butadiene selectivity<br>AgTa/BEA: 82.9% of ethanol conversion and 62.6% of butadiene selectivity<br>CuTa/BEA: 87.9% of ethanol conversion and 72.6% of butadiene selectivity<br>ZnTa/BEA: 51.7% of ethanol conversion and 42.8% of butadiene selectivity                                                              |
|                         | LiZnHf-MFI nanosheet and microporous catalysts [35]                | 593 K, atmospheric pressure, 1.0 g of catalyst, 0.47 h <sup>-1</sup> of WHSV, 3 h of reaction time        | LiZnHf-MFI nanosheet: 64.6% of ethanol conversion and 73.0% of butadiene selectivity<br>LiZnHf-MFI microporous: 21.3% of ethanol conversion and 36.4% of butadiene selectivity                                                                                                                                                                                          |
